# Supplementary material for: Emissions from village cookstoves in Haryana, India, and their potential impacts on air quality
Source: Copernicus journal article supplement (doi:10.5194/acp-18-15169-2018), 2018-10-22

**Table S1.** Average emission factors and standard deviation of PM<sub>2.5</sub> and gas-phase species (g kg<sup>-1</sup> dry fuel carbon) for *dung-chulha*, *brushwood-chulha*, *mixed-chulha*, and *dung-angithi* cook fires. Sample size (n) was n=12 for *dung-chulha*, n=14 for *brushwood-chulha*, n=13 for *mixed-chulha*, n=10 for *dung-angithi*. SOAP values, k<sub>OH</sub>, and MIR values used to calculate predicted SOAP-weighted potentials, OH reactivity, and ozone-forming potential are included for the quantified species. SOAP values were taken from Derwent et al. (2010), k<sub>OH</sub> were found in the NIST Chemical Kinetics Database, and MIR values are found in Carter et al. 1994.

| Compound                                                           | Dung- <i>chulha</i><br>Average (SD) | Brushwood- <i>chulha</i><br>Average (SD) | Mixed- <i>chulha</i><br>Average (SD) | Dung- <i>angithi</i><br>Average (SD) | SOAP           | k <sub>OH</sub> (x 10 <sup>12</sup> )<br>(cm <sup>3</sup> molec <sup>-1</sup> s <sup>-1</sup> ) | MIR<br>(g O <sub>3</sub> / g VOC) |
|--------------------------------------------------------------------|-------------------------------------|------------------------------------------|--------------------------------------|--------------------------------------|----------------|-------------------------------------------------------------------------------------------------|-----------------------------------|
| Carbon dioxide (CO <sub>2</sub> )                                  | 3028 (80)                           | 3365 (148)                               | 3171 (83)                            | 2745 (144)                           | 0 <sup>a</sup> | 0                                                                                               | 0                                 |
| Carbon monoxide (CO)                                               | 301 (33)                            | 143 (78)                                 | 243 (47)                             | 385 (61)                             | 0 <sup>a</sup> | 0.15                                                                                            | 0.056                             |
| Methane (CH <sub>4</sub> )                                         | 21.3 (4.0)                          | 12.9 (5.4)                               | 15.8 (2.7)                           | 46.7 (8.2)                           | 0 <sup>a</sup> | 0.006                                                                                           | 0.0144                            |
| Sulfur-containing                                                  |                                     |                                          |                                      |                                      |                |                                                                                                 |                                   |
| Carbonyl sulfide (OCS)                                             | 0.382 (0.135)                       | 3.89 (1.36) x 10 <sup>-2</sup>           | 0.279 (0.083)                        | 1.09 (0.67)                          | 0 <sup>a</sup> | 0.002                                                                                           | 0                                 |
| DMS (C <sub>2</sub> H <sub>6</sub> S)                              | 2.98 (1.55) x 10 <sup>-2</sup>      | 3.68 (3.36) x 10 <sup>-3</sup>           | 1.57 (0.74) x 10 <sup>-2</sup>       | 0.134 (0.096)                        | 0 <sup>a</sup> | 5.4                                                                                             | 0                                 |
| Halogen-containing                                                 |                                     |                                          |                                      |                                      |                |                                                                                                 |                                   |
| Dichloromethane (CH <sub>2</sub> Cl <sub>2</sub> )                 | 1.37 (1.48) x 10 <sup>-3</sup>      | 5.79 (8.21) x 10 <sup>-4</sup>           | 1.35 (2.20) x 10 <sup>-3</sup>       | 1.41 (0.85) x 10 <sup>-3</sup>       | 0 <sup>a</sup> | 0.123                                                                                           | 0.041                             |
| Chloromethane (CH <sub>3</sub> Cl)                                 | 5.48 (2.41)                         | 0.751 (0.393)                            | 3.34 (1.37)                          | 14.2 (5.8)                           | 0 <sup>a</sup> | 0.369                                                                                           | 0.038                             |
| Bromomethane (CH <sub>3</sub> Br)                                  | 2.02 (0.96) x 10 <sup>-2</sup>      | 2.14 (0.57) x 10 <sup>-3</sup>           | 1.42 (0.59) x 10 <sup>-2</sup>       | 4.42 (1.75) x 10 <sup>-2</sup>       | 0 <sup>a</sup> | 0.0288                                                                                          | 0.0187                            |
| Iodomethane (CH <sub>3</sub> I)                                    | 1.88 (0.40) x 10 <sup>-3</sup>      | 2.61 (0.61) x 10 <sup>-4</sup>           | 7.87 (2.08) x 10 <sup>-4</sup>       | 2.73 (0.51) x 10 <sup>-3</sup>       | 0 <sup>a</sup> | 0.0723                                                                                          | -0.56                             |
| Ethyl chloride (C <sub>2</sub> H <sub>5</sub> Cl)                  | 7.83 (3.93) x 10 <sup>-3</sup>      | 1.13 (0.95) x 10 <sup>-3</sup>           | 5.23 (2.25) x 10 <sup>-3</sup>       | 2.82 (1.08) x 10 <sup>-2</sup>       | 0 <sup>a</sup> | 0.423                                                                                           | 0.29                              |
| Dichloroethane (C <sub>2</sub> H <sub>4</sub> Cl <sub>2</sub> )    | 2.71 (1.00) x 10 <sup>-3</sup>      | 6.86 (5.78) x 10 <sup>-4</sup>           | 4.04 (7.92) x 10 <sup>-3</sup>       | 4.55 (2.82) x 10 <sup>-3</sup>       | 0 <sup>a</sup> | 0.023                                                                                           | 0.21                              |
| Nitrates                                                           |                                     |                                          |                                      |                                      |                |                                                                                                 |                                   |
| Methyl nitrate (CH <sub>3</sub> ONO <sub>2</sub> )                 | 5.62 (19.5) x 10 <sup>-3</sup>      | 1.47 (4.00) x 10 <sup>-2</sup>           | 2.19 (3.95) x 10 <sup>-2</sup>       | 0.527 (1.048)                        | 0 <sup>a</sup> | 0.023                                                                                           | 0                                 |
| Ethyl nitrate (CH <sub>3</sub> ONO <sub>2</sub> )                  | 7.27 (14.5) x 10 <sup>-4</sup>      | 1.50 (2.80) x 10 <sup>-3</sup>           | 7.63 (21.77) x 10 <sup>-3</sup>      | 0.140 (0.357)                        | 0 <sup>a</sup> | 0.178                                                                                           | 0                                 |
| i-Propylnitrate (C <sub>3</sub> H <sub>7</sub> ONO <sub>2</sub> )  | 5.85 (5.66) x 10 <sup>-4</sup>      | 6.57 (13.64) x 10 <sup>-4</sup>          | 1.37 (2.86) x 10 <sup>-3</sup>       | 1.83 (3.75) x 10 <sup>-2</sup>       | 0 <sup>a</sup> | 0.287                                                                                           | 0                                 |
| n-Propylnitrate (C <sub>3</sub> H <sub>7</sub> ONO <sub>2</sub> )  | 1.94 (1.82) x 10 <sup>-4</sup>      | 2.43 (3.83) x 10 <sup>-4</sup>           | 4.81 (11.05) x 10 <sup>-4</sup>      | 5.63 (13.44) x 10 <sup>-3</sup>      | 0 <sup>a</sup> | 0.731                                                                                           | 0                                 |
| 2-Butylnitrate (C <sub>4</sub> H <sub>9</sub> ONO <sub>2</sub> )   | 8.27 (7.41) x 10 <sup>-4</sup>      | 2.82 (3.07) x 10 <sup>-4</sup>           | 2.39 (6.92) x 10 <sup>-3</sup>       | 7.57 (15.15) x 10 <sup>-3</sup>      | 0 <sup>a</sup> | 0.93                                                                                            | 0                                 |
| 3-Pentylnitrate (C <sub>5</sub> H <sub>11</sub> ONO <sub>2</sub> ) | 1.46 (0.49) x 10 <sup>-4</sup>      | 6.15 (5.54) x 10 <sup>-5</sup>           | 1.02 (0.62) x 10 <sup>-4</sup>       | 6.01 (12.55) x 10 <sup>-4</sup>      | 0 <sup>a</sup> | 1                                                                                               | 0                                 |
| 2-Pentylnitrate (C <sub>5</sub> H <sub>11</sub> ONO <sub>2</sub> ) | 7.27 (4.52) x 10 <sup>-5</sup>      | 4.41 (6.71) x 10 <sup>-5</sup>           | 4.05 (4.04) x 10 <sup>-5</sup>       | 5.61 (14.00) x 10 <sup>-4</sup>      | 0 <sup>a</sup> | 1                                                                                               | 0                                 |
| Alkanes                                                            |                                     |                                          |                                      |                                      |                |                                                                                                 |                                   |
| Ethane (C <sub>2</sub> H <sub>6</sub> )                            | 2.21 (0.60)                         | 1.02 (0.64)                              | 1.38 (0.30)                          | 6.38 (2.14)                          | 0.1            | 0.244                                                                                           | 0.28                              |

|                                                     |                                |                                |                                |                                |                  |      |       |
|-----------------------------------------------------|--------------------------------|--------------------------------|--------------------------------|--------------------------------|------------------|------|-------|
| Propane (C <sub>3</sub> H <sub>8</sub> )            | 0.650 (0.219)                  | 0.253 (0.211)                  | 0.378 (0.106)                  | 2.53 (0.49)                    | 0                | 1.1  | 0.49  |
| i-Butane (C <sub>4</sub> H <sub>10</sub> )          | 5.31 (2.14) x 10 <sup>-2</sup> | 1.23 (1.22) x 10 <sup>-2</sup> | 3.12 (0.92) x 10 <sup>-2</sup> | 0.225 (0.048)                  | 0                | 2.12 | 1.23  |
| n-Butane (C <sub>4</sub> H <sub>10</sub> )          | 0.145 (0.058)                  | 4.20 (4.22) x 10 <sup>-2</sup> | 8.83 (3.06) x 10 <sup>-2</sup> | 0.665 (0.148)                  | 0.3              | 2.4  | 1.15  |
| n-Pentane (C <sub>5</sub> H <sub>12</sub> )         | 6.18 (2.46) x 10 <sup>-2</sup> | 1.19 (1.03) x 10 <sup>-2</sup> | 2.99 (1.24) x 10 <sup>-2</sup> | 0.210 (0.091)                  | 0.3              | 3.8  | 1.31  |
| n-Hexane (C <sub>6</sub> H <sub>14</sub> )          | 3.16 (1.30) x 10 <sup>-2</sup> | 5.25 (4.05) x 10 <sup>-3</sup> | 1.74 (0.63) x 10 <sup>-2</sup> | 0.153 (0.034)                  | 0.1              | 5.2  | 1.24  |
| n-Heptane (C <sub>7</sub> H <sub>16</sub> )         | 2.22 (1.02) x 10 <sup>-2</sup> | 2.49 (1.86) x 10 <sup>-3</sup> | 1.29 (0.41) x 10 <sup>-2</sup> | 9.79 (2.63) x 10 <sup>-2</sup> | 0.1              | 6.8  | 1.07  |
| 2-Methylpentane (C <sub>6</sub> H <sub>14</sub> )   | 1.91 (0.75) x 10 <sup>-2</sup> | 3.28 (2.51) x 10 <sup>-3</sup> | 8.44 (5.36) x 10 <sup>-3</sup> | 7.07 (5.18) x 10 <sup>-2</sup> | 0                | 5.2  | 1.5   |
| 3-Methylpentane (C <sub>6</sub> H <sub>14</sub> )   | 1.14 (0.53) x 10 <sup>-2</sup> | 3.23 (2.64) x 10 <sup>-3</sup> | 5.12 (2.44) x 10 <sup>-3</sup> | 2.33 (1.33) x 10 <sup>-2</sup> | 0.2              | 5.2  | 1.8   |
| Alkenes                                             |                                |                                |                                |                                |                  |      |       |
| Ethene (C <sub>2</sub> H <sub>4</sub> )             | 5.73 (1.36)                    | 1.68 (0.73)                    | 3.68 (1.15)                    | 5.47 (1.09)                    | 1.3              | 8.51 | 9     |
| Propene (C <sub>3</sub> H <sub>6</sub> )            | 2.48 (0.60)                    | 0.765 (0.506)                  | 1.36 (0.28)                    | 4.98 (1.04)                    | 1.6              | 30.1 | 11.66 |
| 1-Butene (C <sub>4</sub> H <sub>8</sub> )           | 0.488 (0.140)                  | 0.169 (0.115)                  | 0.274 (0.058)                  | 1.13 (0.30)                    | 1.2              | 31   | 9.73  |
| i-Butene (C <sub>4</sub> H <sub>8</sub> )           | 0.411 (0.125)                  | 9.25 (6.25) x 10 <sup>-2</sup> | 0.209 (0.060)                  | 1.09 (0.49)                    | 0.6              | 51   | 1.23  |
| trans-2-Butene (C <sub>4</sub> H <sub>8</sub> )     | 0.137 (0.047)                  | 5.36 (3.30) x 10 <sup>-2</sup> | 7.79 (2.22) x 10 <sup>-2</sup> | 0.466 (0.170)                  | 4.0              | 64   | 15.16 |
| cis-2-Butene (C <sub>4</sub> H <sub>8</sub> )       | 0.104 (0.037)                  | 4.04 (2.45) x 10 <sup>-2</sup> | 5.88 (1.69) x 10 <sup>-2</sup> | 0.331 (0.145)                  | 3.6              | 56   | 14.24 |
| 3-Methyl-1-butene (C <sub>5</sub> H <sub>10</sub> ) | 4.50 (1.44) x 10 <sup>-2</sup> | 1.53 (1.13) x 10 <sup>-2</sup> | 2.39 (0.62) x 10 <sup>-2</sup> | 0.118 (0.027)                  | 0.6              | 32   | 6.99  |
| 2-Methyl-1-butene (C <sub>5</sub> H <sub>10</sub> ) | 8.33 (2.97) x 10 <sup>-2</sup> | 2.65 (2.72) x 10 <sup>-2</sup> | 3.92 (1.38) x 10 <sup>-2</sup> | 0.238 (0.124)                  | 0.9              | 61   | 6.4   |
| 2-Methyl-2-butene (C <sub>5</sub> H <sub>10</sub> ) | 7.72 (3.14) x 10 <sup>-2</sup> | 1.71 (1.24) x 10 <sup>-2</sup> | 3.61 (1.53) x 10 <sup>-2</sup> | 0.284 (0.146)                  | 1.9              | 87   | 14.08 |
| 1-Pentene (C <sub>5</sub> H <sub>10</sub> )         | 0.128 (0.048)                  | 2.58 (1.64) x 10 <sup>-2</sup> | 6.99 (1.98) x 10 <sup>-2</sup> | 0.378 (0.102)                  | 0                | 27.4 | 7.21  |
| trans-2-Pentene (C <sub>5</sub> H <sub>10</sub> )   | 5.34 (1.68) x 10 <sup>-2</sup> | 2.38 (1.49) x 10 <sup>-2</sup> | 7.79 (2.22) x 10 <sup>-2</sup> | 0.159 (0.064)                  | 3.1              | 67   | 10.56 |
| cis-2-Pentene (C <sub>5</sub> H <sub>10</sub> )     | 3.08 (0.90) x 10 <sup>-2</sup> | 1.49 (0.94) x 10 <sup>-2</sup> | 5.88 (1.69) x 10 <sup>-2</sup> | 7.72 (3.98) x 10 <sup>-2</sup> | 3.1              | 65   | 10.38 |
| 1-Hexene (C <sub>6</sub> H <sub>12</sub> )          | 0.188 (0.072)                  | 3.38 (1.83) x 10 <sup>-2</sup> | 0.101 (0.030)                  | 0.517 (0.157)                  | 0                | 37   | 5.49  |
| 1,2-Propadiene (C <sub>3</sub> H <sub>4</sub> )     | 0.116 (0.033)                  | 3.51 (1.57) x 10 <sup>-2</sup> | 7.55 (2.72) x 10 <sup>-2</sup> | 5.56 (2.84) x 10 <sup>-2</sup> | 1.8 <sup>b</sup> | 0.45 | 8.45  |
| 1,2-Butadiene (C <sub>4</sub> H <sub>6</sub> )      | 1.70 (0.48) x 10 <sup>-2</sup> | 7.54 (4.69) x 10 <sup>-3</sup> | 1.01 (0.33) x 10 <sup>-2</sup> | 1.34 (0.49) x 10 <sup>-2</sup> | 1.8 <sup>b</sup> | 27   | 9.35  |
| 1,3-Butadiene (C <sub>4</sub> H <sub>6</sub> )      | 0.626 (0.221)                  | 0.201 (0.105)                  | 0.352 (0.195)                  | 0.813 (0.254)                  | 1.8              | 67   | 12.61 |
| Isoprene (C <sub>5</sub> H <sub>8</sub> )           | 0.275 (0.151)                  | 5.31 (3.88) x 10 <sup>-2</sup> | 9.89 (7.79) x 10 <sup>-2</sup> | 0.582 (0.444)                  | 1.9              | 100  | 10.61 |
| 1,3-Pentadiene (C <sub>5</sub> H <sub>8</sub> )     | 6.02 (3.37) x 10 <sup>-2</sup> | 2.47 (1.26) x 10 <sup>-2</sup> | 3.08 (2.11) x 10 <sup>-2</sup> | 0.175 (0.091)                  | 1.8 <sup>c</sup> | 117  | 12.5  |
| Alkynes                                             |                                |                                |                                |                                |                  |      |       |
| Ethyne (C <sub>2</sub> H <sub>2</sub> )             | 3.46 (1.21)                    | 1.25 (0.39)                    | 2.89 (1.00)                    | 1.01 (0.74)                    | 0.1              | 0.9  | 0.95  |
| 1-Propyne (C <sub>3</sub> H <sub>4</sub> )          | 0.290 (0.084)                  | 0.103 (0.045)                  | 0.195 (0.070)                  | 0.161 (0.087)                  | 0 <sup>a</sup>   | 3.1  | 6.72  |

|                                                          |                                |                                |                                 |                                 |                  |      |       |
|----------------------------------------------------------|--------------------------------|--------------------------------|---------------------------------|---------------------------------|------------------|------|-------|
| 1-Buten-3-yne (C <sub>4</sub> H <sub>4</sub> )           | 0.155 (0.048)                  | 5.01 (2.27) x 10 <sup>-2</sup> | 0.113 (0.048)                   | 5.37 (3.87) x 10 <sup>-2</sup>  | 0 <sup>a</sup>   | 20   | 10.48 |
| 1-Butyne (C <sub>4</sub> H <sub>6</sub> )                | 2.37 (0.69) x 10 <sup>-2</sup> | 1.09 (0.57) x 10 <sup>-2</sup> | 1.46 (0.44) x 10 <sup>-2</sup>  | 1.85 (0.60) x 10 <sup>-2</sup>  | 0 <sup>a</sup>   | 8    | 6.11  |
| 2-Butyne (C <sub>4</sub> H <sub>6</sub> )                | 1.33 (0.48) x 10 <sup>-2</sup> | 6.84 (3.70) x 10 <sup>-3</sup> | 8.06 (2.13) x 10 <sup>-3</sup>  | 1.40 (0.44) x 10 <sup>-2</sup>  | 0 <sup>a</sup>   | 8    | 16.32 |
| 1,3-Butadiene (C <sub>4</sub> H <sub>2</sub> )           | 1.87 (0.75) x 10 <sup>-2</sup> | 7.27 (3.00) x 10 <sup>-3</sup> | 1.77 (0.62) x 10 <sup>-2</sup>  | 4.74 (4.07) x 10 <sup>-3</sup>  | 0 <sup>a</sup>   | 16   | 5.76  |
| Aromatics                                                |                                |                                |                                 |                                 |                  |      |       |
| Benzene (C <sub>6</sub> H <sub>6</sub> )                 | 3.18 (1.09)                    | 1.00 (0.37)                    | 2.36 (0.68)                     | 2.38 (0.55)                     | 92.9             | 1.2  | 0.72  |
| Toluene (C <sub>7</sub> H <sub>8</sub> )                 | 1.49 (1.03)                    | 0.597 (0.218)                  | 0.972 (0.250)                   | 2.66 (0.52)                     | 100.0            | 6.2  | 4     |
| Ethylbenzene (C <sub>8</sub> H <sub>10</sub> )           | 0.105 (0.027)                  | 3.34 (3.03) x 10 <sup>-2</sup> | 6.43 (1.20) x 10 <sup>-2</sup>  | 0.303 (0.052)                   | 111.6            | 7.5  | 3.04  |
| m/p-Xylene (C <sub>8</sub> H <sub>10</sub> )             | 0.196 (0.044)                  | 7.45 (3.89) x 10 <sup>-2</sup> | 0.131 (0.030)                   | 0.458 (0.093)                   | 75.8             | 19   | 2.51  |
| o-Xylene (C <sub>8</sub> H <sub>10</sub> )               | 7.31 (2.44) x 10 <sup>-2</sup> | 2.24 (1.46) x 10 <sup>-2</sup> | 4.68 (1.21) x 10 <sup>-2</sup>  | 0.246 (0.060)                   | 95.5             | 14   | 2.51  |
| Styrene (C <sub>8</sub> H <sub>8</sub> )                 | 5.88 (1.81) x 10 <sup>-2</sup> | 2.28 (1.50) x 10 <sup>-2</sup> | 3.40 (1.90) x 10 <sup>-2</sup>  | 8.64 (5.96) x 10 <sup>-2</sup>  | 212.3            | 43   | 1.53  |
| i-Propylbenzene (C <sub>9</sub> H <sub>12</sub> )        | 8.97 (2.73) x 10 <sup>-3</sup> | 3.21 (2.78) x 10 <sup>-3</sup> | 5.51 (1.31) x 10 <sup>-3</sup>  | 2.88 (1.51) x 10 <sup>-2</sup>  | 95.5             | 6.6  | 6.23  |
| n-Propylbenzene (C <sub>9</sub> H <sub>12</sub> )        | 2.00 (0.87) x 10 <sup>-2</sup> | 4.90 (4.14) x 10 <sup>-3</sup> | 1.30 (0.47) x 10 <sup>-2</sup>  | 0.122 (0.083)                   | 109.7            | 5.7  | 6.23  |
| 3-Ethyltoluene (C <sub>9</sub> H <sub>12</sub> )         | 4.44 (1.67) x 10 <sup>-2</sup> | 1.46 (1.14) x 10 <sup>-2</sup> | 2.79 (0.98) x 10 <sup>-2</sup>  | 0.221 (0.128)                   | 94.8             | 22.4 | 7.39  |
| 4-Ethyltoluene (C <sub>9</sub> H <sub>12</sub> )         | 1.96 (0.79) x 10 <sup>-2</sup> | 6.78 (4.65) x 10 <sup>-3</sup> | 1.35 (0.59) x 10 <sup>-2</sup>  | 0.115 (0.071)                   | 69.7             | 13.6 | 4.44  |
| 2-Ethyltoluene (C <sub>9</sub> H <sub>12</sub> )         | 2.12 (0.87) x 10 <sup>-2</sup> | 7.22 (4.33) x 10 <sup>-3</sup> | 1.50 (0.62) x 10 <sup>-2</sup>  | 0.116 (0.083)                   | 94.8             | 13.2 | 5.59  |
| 1,3,5-Trimethylbenzene (C <sub>9</sub> H <sub>12</sub> ) | 1.19 (0.55) x 10 <sup>-2</sup> | 4.37 (3.18) x 10 <sup>-3</sup> | 8.59 (4.28) x 10 <sup>-3</sup>  | 6.89 (4.93) x 10 <sup>-2</sup>  | 13.5             | 60   | 11.76 |
| 1,2,4-Trimethylbenzene (C <sub>9</sub> H <sub>12</sub> ) | 3.22 (1.59) x 10 <sup>-2</sup> | 1.14 (0.70) x 10 <sup>-2</sup> | 2.43 (1.28) x 10 <sup>-2</sup>  | 0.193 (0.160)                   | 20.6             | 32   | 8.87  |
| 1,2,3-Trimethylbenzene (C <sub>9</sub> H <sub>12</sub> ) | 1.47 (0.78) x 10 <sup>-2</sup> | 3.11 (2.08) x 10 <sup>-3</sup> | 1.24 (0.82) x 10 <sup>-2</sup>  | 9.30 (9.75) x 10 <sup>-2</sup>  | 43.9             | 29   | 11.97 |
| Terpenes                                                 |                                |                                |                                 |                                 |                  |      |       |
| alpha-Pinene (C <sub>10</sub> H <sub>16</sub> )          | 2.55 (1.92) x 10 <sup>-3</sup> | 1.44 (1.81) x 10 <sup>-3</sup> | 2.54 (2.08) x 10 <sup>-3</sup>  | 6.97 (7.78) x 10 <sup>-3</sup>  | 17.4             | 52   | 4.51  |
| beta-Pinene (C <sub>10</sub> H <sub>16</sub> )           | 6.98 (5.20) x 10 <sup>-3</sup> | 3.69 (2.46) x 10 <sup>-3</sup> | 8.98 (10.14) x 10 <sup>-3</sup> | 8.93 (10.96) x 10 <sup>-3</sup> | 18.1             | 74   | 3.52  |
| Oxygenates                                               |                                |                                |                                 |                                 |                  |      |       |
| Acetaldehyde (C <sub>2</sub> H <sub>4</sub> O)           | 2.48 (0.92)                    | 0.897 (0.520)                  | 1.46 (0.38)                     | 5.26 (2.34)                     | 0.6              | 16   | 6.54  |
| Butanal (C <sub>4</sub> H <sub>8</sub> O)                | 0.132 (0.047)                  | 5.09 (3.32) x 10 <sup>-2</sup> | 8.77 (3.50) x 10 <sup>-2</sup>  | 0.334 (0.145)                   | 0                | 24   | 5.97  |
| Acetone (C <sub>3</sub> H <sub>6</sub> O)                | 2.17 (0.69)                    | 0.977 (0.584)                  | 1.36 (0.35)                     | 6.34 (1.63)                     | 0.3              | 0.19 | 0.36  |
| 2-Butanone (C <sub>4</sub> H <sub>8</sub> O)             | 0.530 (0.183)                  | 0.214 (0.161)                  | 0.338 (0.130)                   | 1.54 (0.47)                     | 0.6              | 1.2  | 1.48  |
| 2-Propenal (C <sub>3</sub> H <sub>4</sub> O)             | 0.573 (0.202)                  | 0.342 (0.177)                  | 0.414 (0.192)                   | 0.914 (0.761)                   | 1.0 <sup>a</sup> | 20   | 7.45  |
| MVK (C <sub>4</sub> H <sub>6</sub> O)                    | 0.396 (0.121)                  | 0.176 (0.117)                  | 0.205 (0.087)                   | 0.865 (0.458)                   | 1.0 <sup>a</sup> | 19   | 9.65  |
| Furan (C <sub>4</sub> H <sub>4</sub> O)                  | 0.336 (0.141)                  | 0.160 (0.086)                  | 0.223 (0.072)                   | 1.17 (0.29)                     | 1.0 <sup>a</sup> | 40   | 9.15  |

|                                                          |               |                                |               |               |                  |     |      |
|----------------------------------------------------------|---------------|--------------------------------|---------------|---------------|------------------|-----|------|
| 2-Methylfuran (C <sub>5</sub> H <sub>6</sub> O)          | 0.360 (0.177) | 0.158 (0.123)                  | 0.226 (0.093) | 1.51 (0.70)   | 1.0 <sup>a</sup> | 62  | 8.3  |
| Furfural (C <sub>5</sub> H <sub>4</sub> O <sub>2</sub> ) | 0.263 (0.218) | 0.113 (0.143)                  | 0.265 (0.161) | 0.981 (0.414) | 1.0 <sup>a</sup> | 35  | 10   |
| Methanol (CH <sub>3</sub> OH)                            | 6.43 (3.77)   | 5.38 (5.20)                    | 3.84 (1.26)   | 13.1 (10.6)   | 0.3              | 0.9 | 0.67 |
| Ethanol (CH <sub>5</sub> OH)                             | 0.126 (0.220) | 5.80 (5.19) x 10 <sup>-2</sup> | 0.184 (0.220) | 0.236 (0.281) | 0.6              | 3.4 | 1.53 |

<sup>a</sup>given values of either 0 or 1, SOAP values not reported

<sup>b</sup>values based on 1,3-butadiene

<sup>c</sup>value based on (*E*)-1,3-Pentadiene

**Table S2. Summary of aromatic compounds, oxygenates, halogen- and sulfur- containing compounds that do not have higher emissions when using *angithi* stove and/or dung fuel. Significant relationships between emissions and either stove or fuel are indicated by marking the type that gives the larger emissions. N/A indicates no relationship was found. P values are listed in addition to the fuel or stove type if the relationship is not clear.**

| Compound           | Stove                        | Fuel          |
|--------------------|------------------------------|---------------|
| Benzene            | <i>Chulha</i>                | Dung          |
| Styrene            | <i>Angithi</i><br>(p=0.0723) | Dung          |
| Acrolein           | <i>Angithi</i><br>(p=0.0787) | Dung          |
| Methanol           | <i>Angithi</i>               | N/A           |
| Ethanol            | N/A                          | N/A           |
| Furfural           | <i>Angithi</i>               | Dung (p=0.03) |
| Dichloromethane    | N/A                          | N/A           |
| 1,2-dichloroethane | <i>Angithi</i>               | N/A           |
| Iodomethane        | <i>Angithi</i><br>(p=0.0891) | Dung          |

**Figure S1. Emission factors (g VOC/ kg fuel C) versus moisture content of the fuel. Red markers indicate dung fuel was used, while blue markers indicate brushwood fuel. Filled square markers indicate *chulha* stoves, while open circles indicate *angithi* stoves were used. If a significant correlation was observed ( $r^2 > 0.70$ ) for a particular fuel-stove combination, the linear regression trendline is shown.**

**a) Total alkanes**

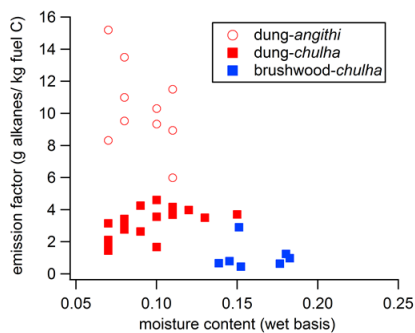

**b) Total alkenes**

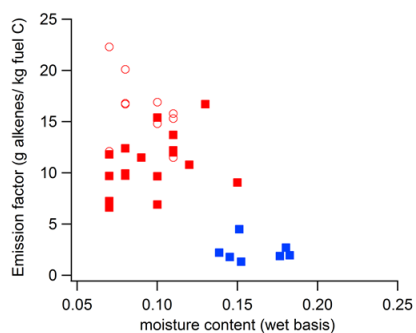

**c) Total alkynes**

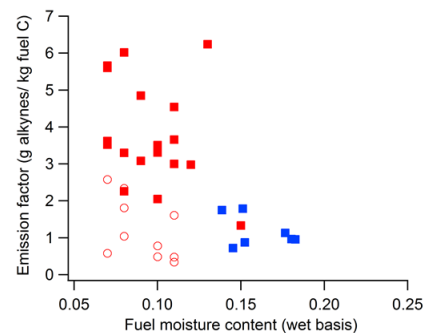

**d) Benzene**

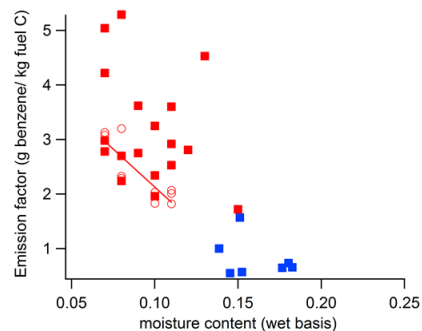

**e) Carbon monoxide**

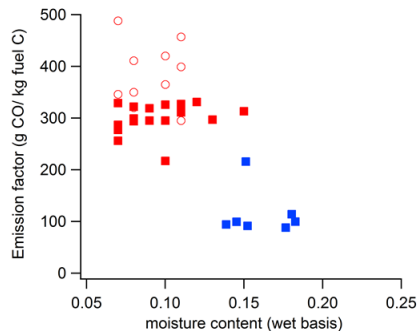

**Figure S2.1 Comparison of EFs (g/ kg dry fuel) in the present study to those of Stockwell et al., 2016 (adjusted). The blue line indicates 1:1 agreement of the emission factors, with points above the blue line indicating higher EFs reported in Stockwell et al., 2016. Likewise, points below represent compounds that have a higher EF in the present study.**

**a) Dung**

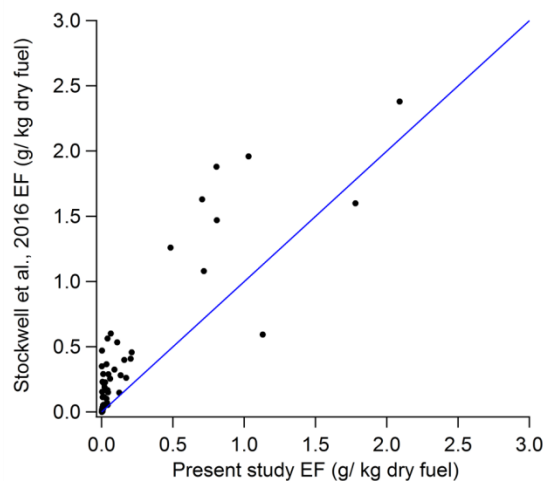

**b) Brushwood**

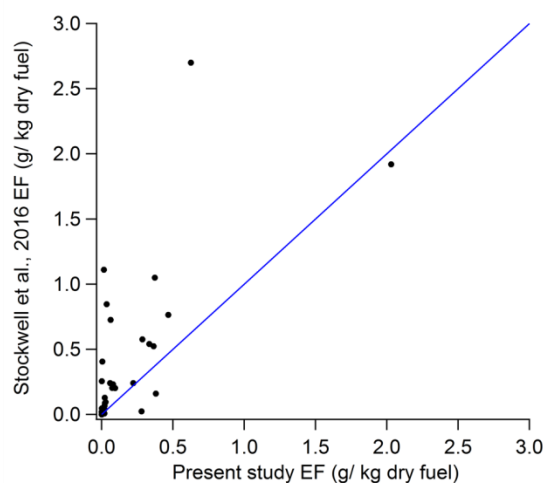

**Figure S2.2 Emission factors (g/ kg fuel C) plotted as a function of modified combustion efficiency for select species. Open circles indicate cooking events conducted with *angithi* stoves, whereas filled squares indicate *chulha* stoves. Color indicates fuel, either brushwood (blue), dung (red), or mixed (purple). Crosses indicate measurements from Stockwell et al. 2016.**

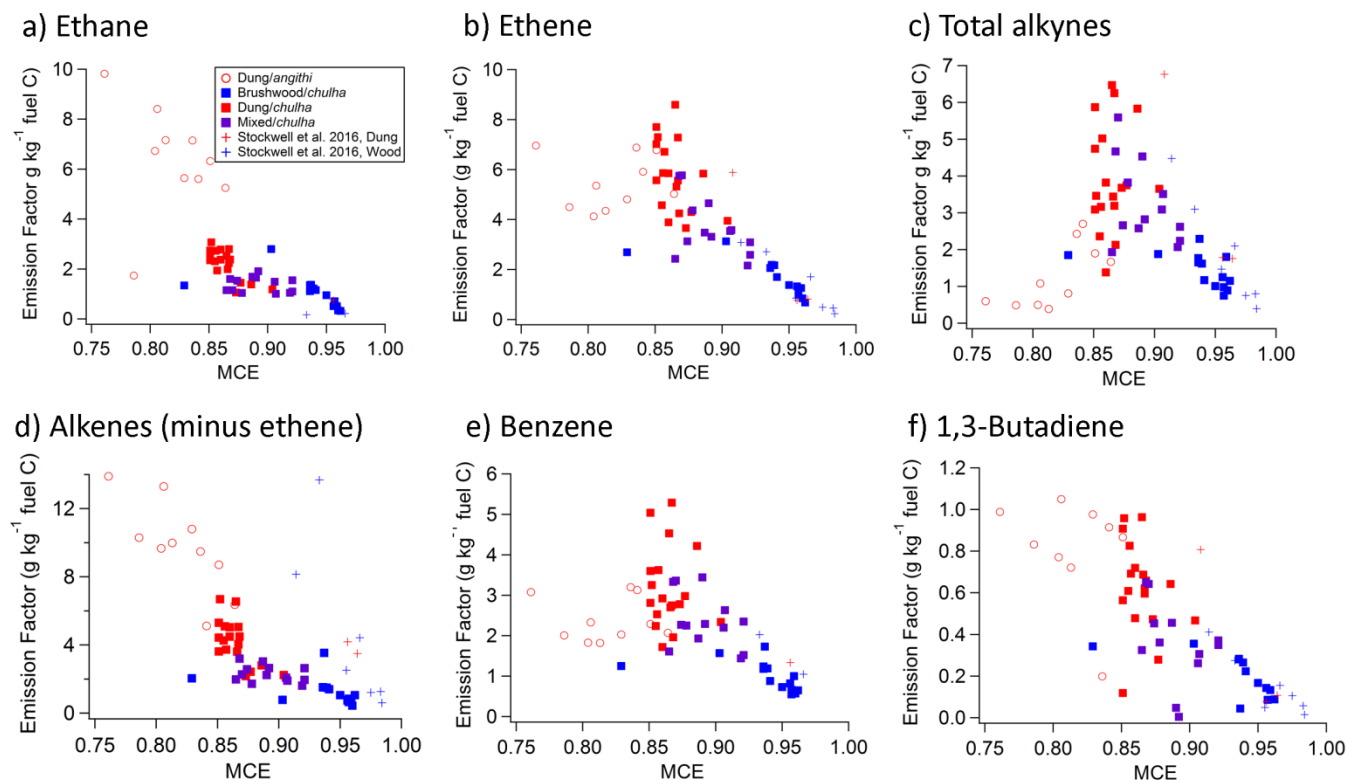

Supplement: Supplementary file 1 [file acp-18-15169-2018-supplement.zip › supporting_information_text.pdf]
