# Supplementary material for: Emissions from village cookstoves in Haryana, India, and their potential impacts on air quality
Source: Copernicus journal article supplement (doi:10.5194/acp-18-15169-2018), 2018-10-22
Supplement: Supplementary file 1 [file acp-18-15169-2018-supplement.zip]

Archive with 3 entries (3 files):
- supporting_information_text.pdf
- acp-18-15169-2018-supplement-title-page.pdf
- supporting_information_data.xlsx
