# Supplementary material for: Emissions from village cookstoves in Haryana, India, and their potential impacts on air quality
Source: Copernicus journal article supplement (doi:10.5194/acp-18-15169-2018), 2018-10-22
Supplement: Supplementary file 1 [file acp-18-15169-2018-supplement.zip › acp-18-15169-2018-supplement-title-page.pdf]

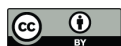

*Supplement of*

**Emissions from village cookstoves in Haryana, India, and their potential impacts on air quality**

**Lauren T. Fleming et al.**

*Correspondence to:* Sergey A. Nizkorodov ([nizkorod@uci.edu](mailto:nizkorod@uci.edu))

- [acp-18-15169-2018-supplement-title-page.pdf](#)
- [supporting\\_information\\_data.xlsx](#)
- [supporting\\_information\\_text.pdf](#)

The copyright of individual parts of the supplement might differ from the CC BY 4.0 License.
