# Supplementary material for: Emissions from village cookstoves in Haryana, India, and their potential impacts on air quality
Source: Copernicus journal article supplement (doi:10.5194/acp-18-15169-2018), 2018-10-22
Supplement: Supplementary file 1 [file acp-18-15169-2018-supplement.zip › supporting_information_data.xlsx]

## Sheet: data
Cookfire Details						Fuel (Wood) used						Fuel (Add'l Wood) used						Fuel (Add'l Wood) used						Fuel (Dung) used							Net Fuel							Emission Factors and Results
						Fuel used	Moisture	Dry Fuel used	C in fuel	Fuel C		Fuel used	Moisture	Dry Fuel used	C in fuel	Fuel C		Fuel used	Moisture	Dry Fuel used	C in fuel	Fuel C		Fuel used	Moisture	Moisture	Dry Fuel used	C in fuel	Fuel C		Ash and Char Measured	Ash and Char Fraction	Carbon Content of Ash	Ash and Char Carbon	Net Carbon	Dry Net Fuel		MCE	PM2.5	CO2	CO	CH4	OCS	DMS	CH3CCl3	CH2Cl2	CH3Cl	CH3Br	CH3I
CAN #	Date	Stove	fuel type	meal		(kg)			%	used (kg)		(kg)			%	used (kg)		(kg)			%	used (kg)		(kg)	Unadjusted	Adjusted		%	used (kg)		(kg)	% of Dry Net Fuel	%, C basis	carbon (kg)	Utilized(Kg)	Utilized(Kg)		%	g/kg dry fuel	g /kg Dry Fuel	g/ kg Dry Fuel	g /kg Dry Fuel	g /kg Dry Fuel	g/ kg Dry Fuel	g /kg Dry Fuel	g /kg Dry Fuel	g /kg Dry Fuel	g /kg Dry Fuel	g/ kg Dry Fuel
2493	2015-08-05	Chula	dung	roti		0	0	0	0.454	0		0	0	0	0.454	0		0	0	0	0.454	0		1.47	36.875	0.116038	1.29942	0.334	0.434008		0.36	0.277046	0.029	0.01044	0.423568	1.29942		0.850813	27.6782	966.411	107.85	8.0829	0.166976	0.0109982	4.08552e-06	0.000548566	2.59614	0.00963385	0.00232237
3109	2015-08-07	Chula	dung	roti		0	0	0	0.454	0		0	0	0	0.454	0		0	0	0	0.454	0		1.57	51.7	0.14717	1.33894	0.334	0.447207		0.52	0.388366	0.029	0.01508	0.432127	1.33894		0.860187	9.87102	977.183	101.086	5.62814	0.0988759	0.0124737	8.94064e-06	0.000515969	1.71355	0.00478563	0.00105501
1183	2015-08-08	Chula	dung	roti		0	0	0	0.454	0		0	0	0	0.454	0		0	0	0	0.454	0		1.41	25.5938	0.0923469	1.27979	0.334	0.42745		0.26	0.203158	0.029	0.00754	0.41991	1.27979		0.857433		987.96	104.549	6.4274	0.0799219	0.00515565	3.0062e-06	0.000251017	0.962786	0.00365648	0.000339106
2214	2015-08-08	Chula	dung	roti		0	0	0	0.454	0		0	0	0	0.454	0		0	0	0	0.454	0		1.73	41.18	0.125078	1.51362	0.334	0.505547		0.48	0.317122	0.029	0.01392	0.491627	1.51362		0.865262		973.003	96.4313	7.37703	0.101603	0.00637669	1.60893e-05	0.000359204	1.3549	0.00501618	0.000465843
1170	2015-08-10	Chula	dung	rice		0	0	0	0.454	0		0	0	0	0.454	0		0	0	0	0.454	0		1.93	23.5367	0.088027	1.76011	0.334	0.587876		0.56	0.318162	0.029	0.01624	0.571636	1.76011		0.867138	16.226	982.904	95.8486	6.74548	0.134911	0.0110271	7.55285e-06	0.00053279	1.88095	0.00651531	0.000691622
1359	2015-08-10	Chula	dung	unknown		0	0	0	0.454	0		0	0	0	0.454	0		0	0	0	0.454	0		1.87	27.235	0.0957935	1.69087	0.334	0.564749		0.64	0.378504	0.029	0.01856	0.546189	1.69087		0.85169		950.372	105.328	8.7163	0.142684	0.0150802	2.71869e-05	0.000462695	2.12044	0.00670796	0.000906311
3212	2015-08-10	Chula	dung	unknown		0	0	0	0.454	0		0	0	0	0.454	0		0	0	0	0.454	0		1.36	19.325	0.0791825	1.25231	0.334	0.418272		0.27	0.215601	0.029	0.00783	0.410442	1.25231		0.86694	16.506	985.97	96.3126	8.29372	0.10541	0.00809857	6.23723e-06	0.000384315	1.44026	0.00530645	0.000513814
1209	2015-08-11	Angithi	dung	animal food		0	0	0	0.454	0		0	0	0	0.454	0		0	0	0	0.454	0		1.52	20.9333	0.08256	1.39451	0.334	0.465766		0.464293	0.332944	0.029	0.0134645	0.452301	1.39451		0.805519	19.1712	866.591	133.161	19.341	0.313549	0.0525675	6.08609e-05	0.000194111	4.78775	0.0117411	0.00101503
3116	2015-08-11	Angithi	dung	animal food		0	0	0	0.454	0		0	0	0	0.454	0		0	0	0	0.454	0		2.06	15.825	0.0718325	1.91203	0.334	0.638616		0.86	0.449785	0.029	0.02494	0.613676	1.91203		0.760653	43.3303	782.001	156.607	19.9264	0.343814	0.0612304	4.38766e-05	0.000574099	5.22544	0.0131206	0.00115383
1226	2015-08-12	Angithi	dung	animal food		0	0	0	0.454	0		0	0	0	0.454	0		0	0	0	0.454	0		1.52	19.4667	0.07948	1.39919	0.334	0.46733		0.55	0.393084	0.029	0.01595	0.45138	1.39919		0.835877	32.4534	904.307	113.007	15.3577	0.224003	0.028801	7.56416e-06	0.000208604	3.67295	0.00827671	0.000899628
2458	2015-08-12	Angithi	dung	animal food		0	0	0	0.454	0		0	0	0	0.454	0		0	0	0	0.454	0		1.8	18	0.0764	1.66248	0.334	0.555268		0.49	0.29474	0.029	0.01421	0.541058	1.66248		0.851168	28.6147	934.958	104.049	12.9341	0.141761	0.0251699	2.10955e-05	0.000407714	2.66269	0.00923241	0.000618559
1113	2015-08-13	Chula	mixture	roti		0.5	0.213	0.3935	0.454	0.178649		0	0	0	0.454	0		0	0	0	0.454	0		1.02	16.3667	0.07297	0.945571	0.334	0.315821		0.26	0.194165	0.258211	0.0671349	0.427335	1.33907		0.892069		1010.2	77.7884	5.33883	0.0716838	0.00579037	5.68609e-06	0.000147005	0.669795	0.00248031	0.000247809
1233	2015-08-13	Chula	mixture	roti		1.06	0.217	0.82998	0.454	0.376811		0	0	0	0.454	0		0	0	0	0.454	0		0.71	20.0333	0.08067	0.652724	0.334	0.21801		0.37	0.249544	0.465624	0.172281	0.42254	1.4827		0.906341	7.55691	919.485	60.4731	4.26198	0.0549401	0.0030273	2.65344e-06	0.000163754	0.511368	0.00204274	0.000193448
1189	2015-08-14	Chula	mixture	roti		0.52	0.142	0.44616	0.454	0.202557		0	0	0	0.454	0		0	0	0	0.454	0		1.06	18.0333	0.07647	0.978942	0.334	0.326967		0.32	0.224545	0.273196	0.0874229	0.4421	1.4251		0.890173	12.7159	976.762	76.6982	5.78405	0.0586786	0.00390694	5.01908e-06	7.00122e-06	0.720888	0.00252955	0.000237557
1255	2015-08-14	Chula	dung	roti		0	0	0	0.454	0		0	0	0	0.454	0		0	0	0	0.454	0		1.79	14.26	0.068546	1.6673	0.334	0.556879		0.44	0.263899	0.029	0.01276	0.544119	1.6673		0.851278	16.6305	966.144	107.426	8.21252	0.096781	0.00542525	3.68665e-06	0.000182092	1.31466	0.00491624	0.00047964
1350	2015-08-16	Chula	dung	roti		0	0	0	0.454	0		0	0	0	0.454	0		0	0	0	0.454	0		1.23	15.375	0.0708875	1.14281	0.334	0.381698		0.59	0.516272	0.029	0.01711	0.364588	1.14281		0.877308	22.4009	993.209	88.4027	4.95851	0.0724224	0.00550921	9.58059e-06	0.000311878	0.915047	0.00351208	0.00039321
3200	2015-08-16	Angithi	dung	animal food		0	0	0	0.454	0		0	0	0	0.454	0		0	0	0	0.454	0		1.46	17.3333	0.075	1.3505	0.334	0.451067		0.47	0.348019	0.029	0.01363	0.437437	1.3505		0.84068	42.003	929.465	112.107	12.6059	0.184537	0	7.23032e-06	0.000151854	2.97553	0.00652709	0.000678062
1067	2015-08-17	Chula	mixture	rice		0.41	0.185	0.33415	0.454	0.151704		0	0	0	0.454	0		0	0	0	0.454	0		1.74	31.5667	0.10489	1.55749	0.334	0.520202		0.29	0.153306	0.166784	0.0483672	0.623539	1.89164		0.877769	9.366	1028.07	91.1146	5.34296	0.0526522	0.00330705	5.66586e-06	0.000154179	0.707967	0.00376177	0.000238809
1282	2015-08-17	Chula	mixture	roti		0.23	0.176	0.18952	0.454	0.0860421		0	0	0	0.454	0		0	0	0	0.454	0		1.4	33	0.1079	1.24894	0.334	0.417146		0.43	0.298931	0.131767	0.0566596	0.446528	1.43846		0.886942	14.3822	975.875	79.1701	4.89982	0.112377	0.0101212	3.01369e-06	0.000490099	1.94498	0.00743597	0.000356771
2066	2015-08-17	Angithi	dung	animal food		0	0	0	0.454	0		0	0	0	0.454	0		0	0	0	0.454	0		1.57	33.5333	0.10902	1.39884	0.334	0.467212		0.49	0.350291	0.029	0.01421	0.453002	1.39884		0.813217	41.9848	882.921	129.067	14.175	0.380288	0.053119	2.23356e-05	0.00101548	8.1354	0.0246682	0.0010384
2581	2015-08-17	Angithi	dung	animal food		0	0	0	0.454	0		0	0	0	0.454	0		0	0	0	0.454	0		1.74	32.9667	0.10783	1.55238	0.334	0.518494		0.61	0.392946	0.029	0.01769	0.500804	1.55238		0.863853	30.6761	948.922	95.1832	13.7235	0.303009	0.0035956	8.11718e-06	0.000629131	5.55484	0.0161983	0.000901328
1301	2015-08-18	Angithi	dung	animal food		0	0	0	0.454	0		0	0	0	0.454	0		0	0	0	0.454	0		1.67	31.8	0.10538	1.49402	0.334	0.499001		0.51	0.341362	0.029	0.01479	0.484211	1.49402		0.786047	33.7115	854.483	148.025	15.6198	0.922723	0.106733	1.57503e-05	0.000672959	1.61738	0.0204109	0.000879268
2596	2015-08-18	Chula	dung	roti		0	0	0	0.454	0		0	0	0	0.454	0		0	0	0	0.454	0		2.27	32.46	0.106766	2.02764	0.334	0.677232		0.58	0.286047	0.029	0.01682	0.660412	2.02764		0.851446	18.1294	958.609	106.446	8.02595	0.150304	0.0121486	2.56802e-05	0.00194498	2.58569	0.0127329	0.000665951
1148	2015-08-19	Chula	dung	rice		0	0	0	0.454	0		0	0	0	0.454	0		0	0	0	0.454	0		1.79	14.85	0.069785	1.66508	0.334	0.556138		0.48	0.288274	0.029	0.01392	0.542218	1.66508		0.885777	13.6161	1015.35	83.3309	6.0501	0.082801	0.00525351	4.18852e-06	0.000191767	1.05126	0.00355461	0.000369826
1356	2015-08-19	Angithi	dung	animal food		0	0	0	0.454	0		0	0	0	0.454	0		0	0	0	0.454	0		1.6	30.9333	0.10356	1.4343	0.334	0.479058		0.46	0.320713	0.029	0.01334	0.465718	1.4343		0.803694	26.7297	876.692	136.286	14.8607	0.315379	0.0459878	1.09493e-05	0.000457421	5.61113	0.0170939	0.000802954
3205	2015-08-19	Angithi	dung	animal food		0	0	0	0.454	0		0	0	0	0.454	0		0	0	0	0.454	0		1.51	31.0667	0.10384	1.3532	0.334	0.451969		0.5	0.369494	0.029	0.0145	0.437469	1.3532		0.829304	32.8339	900.378	117.949	12.5181	0.395487	0.0564458	4.72443e-05	0.00025187	5.60411	0.015632	0.000841271
1026	2015-08-20	Chula	dung	roti		0	0	0	0.454	0		0	0	0	0.454	0		0	0	0	0.454	0		1.81	33.2	0.10832	1.61394	0.334	0.539056		0.52	0.322193	0.029	0.01508	0.523976	1.61394		0.856458	24.8301	967.811	103.234	8.66265	0.162341	0.0176009	1.77595e-05	0.000286101	2.16408	0.00789668	0.000458105
3125	2015-08-20	Chula	dung	rice		0	0	0	0.454	0		0	0	0	0.454	0		0	0	0	0.454	0		1.96	31.9474	0.105689	1.75285	0.334	0.585451		0.48	0.27384	0.029	0.01392	0.571531	1.75285		0.860071	12.6784	978.015	101.27	5.92161	0.189281	0.0131133	2.54033e-05	0.000235994	2.70023	0.00958077	0.000580768
3270	2015-08-20	Chula	dung	rice		0	0	0	0.454	0		0	0	0	0.454	0		0	0	0	0.454	0		1.8	18.625	0.0777125	1.66012	0.334	0.554479		0.51	0.307207	0.029	0.01479	0.539689	1.66012		0.866177	18.1983	990.071	97.3533	6.77908	0.110325	0.00839729	8.10706e-06	0.00036975	1.41462	0.00556298	0.000429184
1066	2015-08-21	Chula	dung	rice		0	0	0	0.454	0		0	0	0	0.454	0		0	0	0	0.454	0		1.9	14.925	0.0699425	1.76711	0.334	0.590214		0.51	0.288607	0.029	0.01479	0.575424	1.76711		0.873081	12.2207	1011.52	93.5854	5.18279	0.0856627	0.00346957	5.95771e-06	0.000177624	0.872774	0.00345907	0.000210891
1276	2015-08-21	Chula	dung	roti		0	0	0	0.454	0		0	0	0	0.454	0		0	0	0	0.454	0		2.36	31.4	0.10454	2.11329	0.334	0.705837		0.72	0.340702	0.029	0.02088	0.684957	2.11329		0.867865	22.614	987.02	95.6429	7.15574	0.183205	0.0162463	1.42312e-05	0.000528522	3.03764	0.0105868	0.000480594
3016	2015-08-21	Chula	dung	rice		0	0	0	0.454	0		0	0	0	0.454	0		0	0	0	0.454	0		1.71	18.85	0.078185	1.5763	0.334	0.526485		0.52	0.329886	0.029	0.01508	0.511405	1.5763		0.855419	37.6515	970.026	104.346	6.95124	0.178606	0.0143033	1.32365e-05	0.000410695	2.62853	0.0094326	0.000395739
1251	2015-08-22	Chula	dung	rice		0	0	0	0.454	0		0	0	0	0.454	0		0	0	0	0.454	0		1.63	30.9	0.10349	1.46131	0.334	0.488078		0.42	0.287413	0.029	0.01218	0.475898	1.46131		0.904026	19.3035	1046.43	70.7038	5.36253	0.090435	0.00368446	1.09116e-05	0.000337132	1.29815	0.00548749	0.000218146
1285	2015-08-22	Chula	mixture	roti		0.65	0.153	0.55055	0.454	0.24995		0	0	0	0.454	0		0	0	0	0.454	0		1.02	31.3333	0.1044	0.913512	0.334	0.305113		0.42	0.286873	0.322313	0.135372	0.419691	1.46406		0.92067	10.2734	936.413	51.3526	5.37209	0.102852	0.00707878	1.30731e-05	0.000343045	1.31573	0.00554407	0.000255016
1013	2015-08-23	Chula	mixture	roti		0.52	0.188	0.42224	0.454	0.191697		0	0	0	0.454	0		0	0	0	0.454	0		1.9	31.45	0.104645	1.70117	0.334	0.568192		0.59	0.277854	0.184103	0.108621	0.651269	2.12341		0.874314	10.9353	952.542	87.1499	5.33536	0.101907	0.00515821	1.54833e-05	0.000224864	1.06292	0.00451485	0.000219387
2000	2015-08-23	Chula	mixture	rice		0.41	0.177	0.33743	0.454	0.153193		0	0	0	0.454	0		0	0	0	0.454	0		1.46	31.775	0.105328	1.30622	0.334	0.436278		0.47	0.285949	0.189128	0.0888904	0.500581	1.64365		0.864517	10.5382	943.38	94.0939	3.27547	0.10871	0.0031731	6.39057e-06	0.000155503	1.01226	0.00441496	0.000179442
1102	2015-08-24	Chula	mixture	roti		0.52	0.151	0.44148	0.454	0.200432		0	0	0	0.454	0		0	0	0	0.454	0		1.52	31.675	0.105117	1.36022	0.334	0.454314		0.57	0.316368	0.220127	0.125473	0.529273	1.8017		0.920995	10.9015	964.243	52.6437	3.86054	0.120557	0.00383197	1.4884e-05	0.00250919	0.786248	0.00316578	0.000168224
1300	2015-08-24	Chula	mixture	rice		0.47	0.316333	0.321323	0.454	0.145881		0	0	0	0.454	0		0	0	0	0.454	0		1.34	15	0.0701	1.24607	0.334	0.416186		0.39	0.248821	0.188904	0.0736727	0.488394	1.56739		0.869814	10.2555	955.536	91.0223	6.06939	0.0686961	0.00309676	8.14599e-06	0.000199913	1.00271	0.00482933	0.000232429
1018	2015-08-25	Chula	mixture	rice		0.36	0.14	0.3096	0.454	0.140558		0	0	0	0.454	0		0	0	0	0.454	0		1.64	30.5	0.10265	1.47165	0.334	0.491532		0.48	0.269473	0.164572	0.0789945	0.553096	1.78125		0.868442	13.5003	947.793	91.3799	5.58619	0.106561	0.00709207	1.53693e-05	0.000385127	1.74212	0.00798782	0.000394365
1297	2015-08-25	Chula	mixture	roti		0.97	0.153	0.82159	0.454	0.373002		0	0	0	0.454	0		0	0	0	0.454	0		1.51	31.6	0.10496	1.35151	0.334	0.451404		0.51	0.234688	0.323897	0.165187	0.659219	2.1731		0.919297	8.69756	999.844	55.8633	3.6316	0.0724297	0.00181927	1.26407e-05	0.000210759	0.802474	0.00345941	0.000181574
2009	2015-08-25	Chula	mixture	rice		0.52	0.132	0.45136	0.454	0.204917		0	0	0	0.454	0		0	0	0	0.454	0		1.57	31	0.1037	1.40719	0.334	0.470002		0.5	0.269027	0.218428	0.109214	0.565705	1.85855		0.907158	12.584	982.655	64.0064	4.22636	0.0727025	0.00512669	2.95117e-06	0.000264206	0.986535	0.00434342	0.000230522
1288	2015-08-26	Chula	brushwood	rice		1.21	0.138667	1.04221	0.454	0.473165		0	0	0	0.454	0		0	0	0	0.454	0		0	0	0		0.334			0.09	0.0863547	0.809	0.07281	0.400355	1.04221		0.958995	3.16778	1330.83	36.2161	3.43337	0.0132452	0.00128824	1.69346e-06	0.00011915	0.186423	0.00078899	0.00010437
1390	2015-08-26	Chula	brushwood	roti		1.5	0.180333	1.2295	0.454	0.558193		0	0	0	0.454	0		0	0	0	0.454	0		0	0	0		0.334			0.17	0.138268	0.809	0.13753	0.420663	1.2295		0.950326	5.77499	1171.32	38.9665	3.6735	0.0148738	0.000760648	2.18943e-06	0	0.204661	0.00103852	0.000100487
2336	2015-08-27	Chula	brushwood	rice		1.48	0.182679	1.20964	0.454	0.549175		0	0	0	0.454	0		0	0	0	0.454	0		0	0	0		0.334			0.14	0.115737	0.809	0.11326	0.435915	1.20964		0.956655	5.1361	1245.41	35.9131	3.0744	0.0142064	9.72439e-05	5.59567e-06	1.56857e-05	0.238676	0.000811786	0.000108547
2356	2015-08-27	Chula	brushwood	roti		1.35	0.152333	1.14435	0.454	0.519535		0	0	0	0.454	0		0	0	0	0.454	0		0	0	0		0.334			0.11	0.0961244	0.809	0.08899	0.430545	1.14435		0.960335	2.52386	1310.79	34.4575	2.58505	0.0138742	0	3.22521e-06	4.32514e-05	0.149548	0.000580726	9.38966e-05
7215	2015-08-27	Chula	brushwood	dahl+squash		1.8	0.145286	1.53849	0.454	0.698473		0	0	0	0.454	0		0	0	0	0.454	0		0	0	0		0.334			0.16	0.103998	0.809	0.12944	0.569033	1.53849		0.956677	4.83456	1274.3	36.727	5.06144	0.00947236	0.00153149	2.22306e-06	0.000286013	0.193812	0.000716675	8.22953e-05
1017	2015-08-28	Chula	brushwood	rice		1.12	0.363857	0.71248	0.454	0.323466		0.21	0.1298	0.182742	0.454	0.0829649		0.11	0.252333	0.0822433	0.454	0.0373385		0	0	0		0.334			0.07	0.0716138	0.809	0.05663	0.387139	0.977465		0.937194	25.9037	1318.29	56.2267	6.06243	0.0246929	0.00542681	1.17836e-05	0.000233446	0.63793	0.00102341	0.00012622
6223	2015-08-28	Chula	brushwood	roti		1.36	0.176571	1.11986	0.454	0.508418		0	0	0	0.454	0		0	0	0	0.454	0		0	0	0		0.334			0.14	0.125015	0.809	0.11326	0.395158	1.11986		0.96181	7.22933	1229.76	31.0769	2.33452	0.00876096	0.00128751	7.81779e-06	3.92536e-05	0.208192	0.000822852	7.77802e-05
9003	2015-08-28	Chula	brushwood	rice		1.19	0.151167	1.01011	0.454	0.458591		0	0	0	0.454	0		0	0	0	0.454	0		0	0	0		0.334			0.09	0.0890991	0.809	0.07281	0.385781	1.01011		0.903418	3.89771	1213.33	82.5558	9.45662	0.0243739	0.00125973	1.18712e-05	0.00121756	0.121042	0.0003622	4.4333e-05
1344	2015-08-30	Chula	brushwood	rice		1.27	0.29152	0.89977	0.454	0.408495		0.28	0.138	0.24136	0.454	0.109577				0	0.454	0		0	0	0		0.334			0.12	0.105159	0.809	0.09708	0.420993	1.14113		0.939204	5.86354	1242.79	51.2009	5.77774	0.0147894	0.000652828	7.70932e-06	0.000110434	0.245767	0.000845821	0.000117077
1378	2015-08-30	Chula	brushwood	rice		1.12	0.2901	0.795088	0.454	0.36097		0.14	0.1932	0.112952	0.454	0.0512802				0	0.454	0		0	0	0		0.334			0.1	0.110127	0.809	0.0809	0.33135	0.90804		0.935526	7.66894	1224.06	53.6904	4.48605	0.0135672	0.00129883	2.09757e-06	0.000334514	0.314062	0.000746853	6.2199e-05
3216	2015-08-30	Chula	brushwood	roti		1.68	0.294687	1.18493	0.454	0.537956		0	0	0	0.454	0		0	0	0	0.454	0		0	0	0		0.334			0.1	0.0843935	0.809	0.0809	0.457056	1.18493		0.941283	9.44759	1303.22	51.7396	4.42857	0.0157289	0.0018641	4.13295e-06	4.12694e-05	0.459358	0.00114913	0.000111327
3283	2015-08-30	Chula	brushwood	roti		1.16	0.30425	0.80707	0.454	0.36641		0.4	0.13525	0.3459	0.454	0.157039				0	0.454	0		0	0	0		0.334			0.13	0.112752	0.809	0.10517	0.418278	1.15297		0.936244	8.25823	1212.49	52.5501	6.40627	0.0182866	0.00100292	2.73929e-06	0.000362361	0.20909	0.000656235	9.00303e-05
1168	2015-08-31	Chula	brushwood	roti		1.94	0.287933	1.38141	0.454	0.62716		0.19	0.2598	0.140638	0.454	0.0638497				0	0.454	0		0	0	0		0.334			0.14	0.0919814	0.809	0.11326	0.577749	1.52205		0.828966	6.82835	1115.04	146.419	7.66987	0.00546463	0.00246955	1.26131e-05	0.000192569	0.55498	0.00098299	0.000118049
6297	2015-09-02	Chula	brushwood	rice		0.92	0.397235	0.554544	0.454	0.251763		0.16	0.227514	0.123598	0.454	0.0561134				0	0.454	0		0	0	0		0.334			0.09	0.132716	0.809	0.07281	0.235066	0.678141		0.956263	7.28016	1199.2	34.9082	2.75613	0.010766	0.00052731	6.95206e-06	5.14268e-05	0.200434	0.0005631	0.000110816
																																						Dung/Chulha
																																						0.850813	19.237	983.778	97.7305	6.91854	0.12403	0.00968676	1.1769e-05	0.000446172	1.78065	0.00657467	0.000609785
																																						0.0137399	7.07225	22.8194	9.48116	1.22878	0.0395034	0.0045424	7.85002e-06	0.000394015	0.702524	0.0027788	0.000478051
																																						Brushwood/Chulha
																																						0.828966	7.41534	1242.2	53.0463	4.80043	0.0144359	0.00139052	5.90312e-06	0.000217638	0.280284	0.000792092	9.62449e-05
																																						0.0348507	5.67326	60.9897	30.1327	2.08717	0.00536456	0.00133558	3.95356e-06	0.000312596	0.157039	0.000213126	2.30663e-05
																																						Mixed/Chulha
																																						0.864517	10.9756	968.677	74.8274	4.84497	0.0849805	0.00480998	8.53664e-06	0.000404204	1.02046	0.00434692	0.000241181
																																						0.0207958	2.00618	30.991	16.0251	0.893073	0.0242221	0.00226412	5.0205e-06	0.000644171	0.422093	0.00180552	6.6277e-05
																																						Dung/Angithi
																																						0.863853	33.1508	888.072	124.544	15.1062	0.352455	0.043365	2.45024e-05	0.000456324	4.58472	0.0142901	0.000882833
																																						0.0313535	7.63241	48.3349	19.5089	2.62471	0.216623	0.0310872	1.9278e-05	0.000272907	1.886	0.00566022	0.000161807
[truncated: 148 more columns]

## Sheet: notes
	indicates we were not able to quanitfy this particular compound for this sample
